# Supplementary material for: Leishmania major-induced alteration of host cellular and systemic copper homeostasis drives the fate of infection
Source: PubMed Central journal article supplement — Commun Biol. 2024 Sep 30;7:1226. doi: 10.1038/s42003-024-06716-2 (PMC11442737; doi:10.1038/s42003-024-06716-2), 2024-09-30
Supplement: 42003_2024_6716_MOESM3_ESM.pdf [file 42003_2024_6716_MOESM3_ESM.pdf]

## **Description of Additional Supplementary Files**

File name: Supplementary data

Description: Contains all source data underlying the graphs and charts presented in the main figures.
